# Supplementary material for: Life cycle considerations of nano-enabled agrochemicals: are today's tools up to the task?
Source: Royal Society of Chemistry journal article supplement (doi:10.1039/c7en01166k), 2018-01-01
Supplement: c7en01166k1.xlsx [file c7en01166k1.xlsx]

## Sheet: Table S1
					Manufacturing data				Use Phase data
ENM type	Plant type	Growth medium	Controls	Reported benefit	Method of synthesis	Chemical	Energy	Emissions	Amount used	Amount leached	Amount uptake	Method of application	Quality/composition Factors	Effect on soil bacterial community	References	Suggested mechanisms
Urea-Hydroxyapatite	Rice	Field test, soil type characterized	Compared to bulk granular urea, and no fertilizer	Increased crop yield	Solid urea mixed with Ca(OH)2 and H3PO4 and flash dried at 60C	75 kg urea, 75 l Ca(OH)2, 5.05 L H3PO4. No data on yield	N//A	N/A	50 kg/HA of nanohybrid, 3 applications at 2 week intervals), 50% less than recommended amount	N/A	NPK content in leaf after 4 weeks	N/A	Leaf nutrient analysis: N using standard Kjeldhal method, P using vanadomolybdate method and K using ICP-MS	N/A	Kottegoda , N, (2017)	Slow release of fertilizer
ZnO	Cluster bean	Soil collected from location and characterized	Bulk ZnO and no treatment	Increase in plant biomass and height and other conditions	Biosynthesized from Aspergillus fumigatus fungi	N/A	N/A	N/A	25 ml per pot	N/A	N/A	Foliar spray	N/A	N/A	Raliya, R., & Tarafdar, J. C. (2013)
TiO2	Wheat	Soil collected from location and characterized	Bulk Ti under water stress and normal irrigation	Increase in height in non stressed treated plants	N/A	N/A	N/A	N/A	240 ml titanium per m2	N/A	N/A	Foliar spray	Gluten and starch content	N/A	Jaberzadeh, A., et al (2013)
Mg	Black-eyed pea	Unspecified soil	Bulk Mg	Increased yields	N/A	N/A	N/A	N/A	0.5 g/L solution, but no amount	N/A	Leaf and stem content	Foliar spray	Leaf chlorophyll and seed protein level	N/A	Delfani, M., et al (2014)
Mo	chickpea	Light sandy loam soil + microorganisms	water, colloid of nano Mo, microbial prep, microbial prep + nano Mo	increased nodule formation in plant	Metal dispersion by electric current pulses in water	N/A	N/A	N/A	8 mg/L, no amount	N/A	N/A	Seed soaked	Catalase activity	monitoring symbiotic bacteria	Taran, N. Y., et al (2014)
CNT	tomato	Soil	Activated carbon	increase in height, leaves, flowers, fruits, seeds per fruit	Radio frequency chemical vapor deposition at 720C + purification	Stoichiometric comporisitions by weight (Fe:Co:CaCO3)	N/A	N/A	50 ml for different concentrations	N/A	CNT in flowers	Seed germinated on supplemented agar plates + soil amendment (watering)	N/A	compared diversity of bacterial community	Khodakovskaya, M. et al (2013)
Al	kidney beans	Soil from location and characterized	Aluminum oxide, carboxylate ligand coating	N/A	electroexploded wire and then passivated through air, or carboxylic acid	N/A	N/A	N/A	mg/kg concentrations for 200 g soil	Al concentration in sand only columns, used mini lysimeters to collect water samples from soil to measure dissolved Al	Al content in shoots and leaves	Soil amendment	N/A	microtox and kinetics mineralization of C14 radiolabeled glucose, concentration in bulk and rhizospheric soil	Doshi, R., et al (2008)
CeO2	Wheat	Silty clay, characterized	No NPs	increased grain properties, not so much for yield	N/A	N/A	N/A	N/A	mg/kg concentrations for ~110 kg soil	N/A	Ce concentration in plant tissue	Soil amendment	Enzyme and chlorophyll content, starch sugar and protein content	N/A	Du, W., et al (2015)
Carbon	Rice	Soil from location and characterized	Bulk and no treatment	Increased yield and nitrogen use efficiency	N/A	N/A	N/A	N/A	N/A	N/A	N/A	N/A	Chlorophyll content	N/A	Wu, M. (2012)	The carbon is non-conductive and low-lighted and could detach N from NH4+ which releases H+ and promotes the plant to absorb the soil water and nutrients thus improving photosynthesis. EC was improved with the addition of nano-carbon which promoted the flow of nutrients into the plant
CeO2, ZnO	Cucumber	Mix of local soil, sand, and potting mix	No NPs	N/A	N/A	N/A	N/A	N/A	400 and 800 mg/kg soil	N/A	Ce and Zn in root, stem, leaf, and fruit	Soil amendment	Gas exchange, chlorophyll content, growth parameters	N/A	Zhao, L., et al (2013)
CeO2, ZnO	Corn	Mix of local soil, sand, and potting mix	No NPs	N/A	N/A	N/A	N/A	N/A	400 and 800 mg/kg soil	N/A	Ce: root and stem, Zn: root, stem, leaf, cob	Soil amendment	Gas exchange, chlorophyll content, growth parameters	N/A	Zhao, L., et al (2015)
CuO	Rice	Soil from location and characterized	Bulk and no treatment	Increased soil electrical conductivity,	N/A	N/A	N/A	N/A	50, 100 , 500, 1000 mg/kg dry soil	N/A	Root, stem, leaf, chaff	Soil amendment	Soil properties, growth parameters, plant tissue	N/A	Peng, C., et al (2017)
Fe2O3	Soybean	Soil from location and characterized	No NPs	Increased yield, pod and leaf dry weight	N/A	N/A	N/A	N/A	0.25, 0.5, 0.75, 1 g/L	N/A	N/A	Foliar spray	N/A	N/A	Sheykhbaglou, R., et al (2010)
Si, Pd, Au, Cu	Lettuce	Soil combined with potting mix	No NPs	Increased plant growth	N/A	N/A	N/A	N/A	130 and 660 mg/kg soil	N/A	N/A	Soil amendment	N/A	Statistically insignificant influence on colony forming units, peak areas of methyl ester of fatty acids, and total soil community metabolic fingerprint	Shah, V. & Belozerova, I. (2009)
ZnO	Alfalfa	Local soil and organic potting mix	Bulk, ionic, and no treatment	N/A	N/A	N/A	N/A	N/A	250, 500, and 750 mg/kg soil	N/A	Zn in root, stem, leaf, and nodule	Soil amendment	Growth parameters, protein content, catalase	N/A	Bandyopadhyay, S., et al (2015)
ZnO	Cowpea	Soil from location and characterized	Bulk	N/A	N/A	N/A	N/A	N/A	500 mg/kg soil	N/A	No significant difference between Zn accumulation	Foliar spray	Growth parameters	N/A	Wang, P., et al (2013)
Fe@ZnO	Green Pea	Soil from location and characterized	No NPs	ZnO doped with Fe was less toxic	N/A	N/A	N/A	N/A	125, 250, 500 mg/kg soil	N/A	Zn in root and stem	Soil amendment	Growth parameters, chlorophyll content, H2O2 generation, Enzyme activity,	N/A	Mukherjee, A., et al (2014)
ZnO	Peanut	Soil from location and characterized	Bulk	Increased germination, seed vigor, shoot and root growth	Oxalate decomposition	0.2 M zinc acetate and oxalic acid	N/A	N/A	400, 1000, 2000 mg/L	N/A	Zn in seed	Seed inoculation	Growth parameters, chlorophyll	N/A	Prasad, T., et al (2012)
ZnO	Soybean	Soil from location and characterized	No NPs	Increased root biomass and nodules	N/A	N/A	N/A	N/A	0.05, 0.1, 0.5 g/kg soil	N/A	Zn in roots, nodules, stem, leaf, and pod	Soil amendment	Growth parameters, nitrogen fixation potential	N/A	Priester, J., et al (2012)
CeO2	Soybean	Soil from location and characterized	No NPs	N/A	N/A	N/A	N/A	N/A	0.1, 0.5, 1.0 g/kg soil	N/A	Ce in roots and nodules	Soil amendment	Growth parameters, nitrogen fixation potential	N/A	Priester, J., et al (2012)
ZnO, CeO2	Soybean	Soil from location and characterized	No NPs	Increased accumulation of some micro and macronutrients	N/A	N/A	N/A	N/A	Zn: 50, 100, 500 mg/kg soil, Ce: 100, 500, 1000 mg/kg soil	N/A	Zn and Ce in pods	Soil amendment	Nutrient content	N/A	Peralta-Videa, J., et al (2014)
ZnO	Tomato	Soil	No NPs	Increasead plant height, root length, chlorophyll content, fruit yield, lycopene content	Sol-gel method	Zn(NO3)2·6H2O mixed with starch	N/A	N/A	10, 100, 250, 500, 750, 1000 mg/kg	N/A	Zn in stem, roots, leaves, and fruits	Soil amendment and foliar spray	Growth parameters, chlorophyll content, nutritional content	N/A	Raliya, R., et al (2015)
TiO2	Tomato	Soil	No NPs	Increased root length, chlorophyll content, fruit yield, lycopene content	Hydrothermal reaction	0.02 M titanium isopropoxide	N/A	N/A	10, 100, 250, 500, 750, 1000 mg/kg	N/A	Ti in stem, roots, leaves, and fruits	Soil amendment and foliar spray	Growth parameters, chlorophyll content, nutritional content	N/A	Raliya, R., et al (2015)
ZnO, TiO2	Wheat	Loamy clay soil	No NPs	TiO2: Increased urease activity	N/A	N/A	N/A	N/A	Zn: ~45 mg/kg, Ti: ~90 mg/kg	N/A	Zn in stem, shell, and grain	Soil amendment	Growth parameters, soil enzyme activities	Decreased soil protease, catalase, and peroxidase	Du, W., et al (2011)
Ag	Faba bean	Soil from location and characterized	Bulk	N/A	Thermal method	Polvinylpyrrolidone	N/A	N/A	100, 200, 300, 400, 500, 600, 700, 800, 900 µg/kg soil	N/A	N/A	Soil amendment	Growth parameters, soil processes	Decreased nodulation, nitrogenase activity, mycorrhizal colonization, and glomalin content	Abd-Alla, M., et al (2016)
Au	Mustard	Soil from location and characterized	no NPs	Increased germination rate, number of leaves, plant height, chlorophyll content, seed yield, sugar content, improved redox status	Chemical reduction of HAuCl4	HAuCl4 and tri-sodium citrate salt	N/A	N/A	10, 25, 50, 100 mg/L	N/A	Au in leaf	Foliar spray	Growth parameters, chlorophyll content, malondialdehyde content, hydrogen peroxide content	N/A	Arora, S., et al (2012)
TiO2	Cucumber	Soil from location and characterized	No NPs	Increase in chlorophyll content, and change in phosphorous and potassium content	N/A	N/A	N/A	N/A	250, 500, 750 mg/kg soil	N/A	N/A	Soil amendment	Chlorophyll content, P and K content in cumcumber fruits	N/A	Servin, A. D., et al (2013)
TiO2	Ulmus elongata	Soil	No NPs	N/A	Prepared via a facile, low-temperature, nonhydrolytic solegel reaction of TiCl4 and benzyl alcohol	N/A	N/A	N/A	0.1, 0.2. 0.4 g/100 ml distilled water	N/A	N/A	Foliar spray	Chlorophyll, Mg, K, Mn, and Cu contents. Leaf total carbon and nitrogen content	N/A	Gao, J., et al (2012)	nanomaterial stimulated the synthesis of carbohydrates and lipids, which are indicators of plant response to stress
CeO2	Wheat	Soil	No NPs	Increase in plant growth, shoot biomass, and grain yield	N/A	N/A	N/A	N/A	125, 25, 500 mg/kg in 2 kg of soil		Ce concentration in root, leaves, hull and grains	Soil amendment	K, P, Ca, Mg, S, Na, Fe, Mn, Zn, Cu concentration in root, leaves and grains. Amino acid and fatty acid content.	N/A	Rico, C. M., et al (2014)
CeO2	Bean	2 types of soil (different organic matter content) from location and characterized	No NPs	N/A	N/A	N/A	N/A	N/A	62.5, 125, 250, 500 mg/kg soil	N/A	Ce concentration in carpels and seeds	Soil amendment	Micro- and macro-nutrient content	N/A	Majumdar, S., et al (2015)
